# Supplementary material for: Neuroinflammation as a cause of differential Müller cell regenerative responses to retinal injury
Source: PubMed Central journal article supplement — Sci Adv. 2024 Oct 2;10(40):eadp7916. doi: 10.1126/sciadv.adp7916 (PMC11446274; doi:10.1126/sciadv.adp7916), 2024-10-02
Supplement: sciadv.adp7916_sm.pdf [file sciadv.adp7916_sm.pdf]

Supplementary Materials for  
**Neuroinflammation as a cause of differential Müller cell regenerative responses to retinal injury**

Diana García-García *et al.*

Corresponding author: Muriel Perron, [muriel.perron@universite-paris-saclay.fr](mailto:muriel.perron@universite-paris-saclay.fr)

*Sci. Adv.* **10**, eadp7916 (2024)  
DOI: 10.1126/sciadv.adp7916

**This PDF file includes:**

Figs. S1 to S9  
Tables S1 to S5

Figure S1

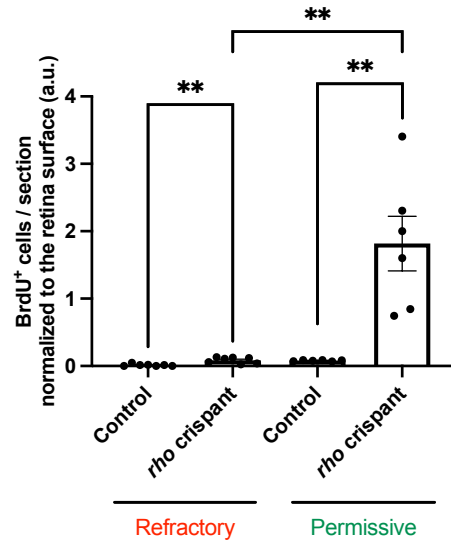

**Figure S1. The response of Müller cells to injury varies along with aging in *Xenopus* tadpoles.** Quantification of BrdU-positive cells (3-day exposure) in retinal sections of young (refractory) or old (permissive) control and *rho* crispant tadpoles. Data were normalized to the entire surface of the retinal section and are represented as mean  $\pm$  SEM. Each point represents one retina. \*\* $p < 0.01$  (Mann-Whitney test).

Figure S2

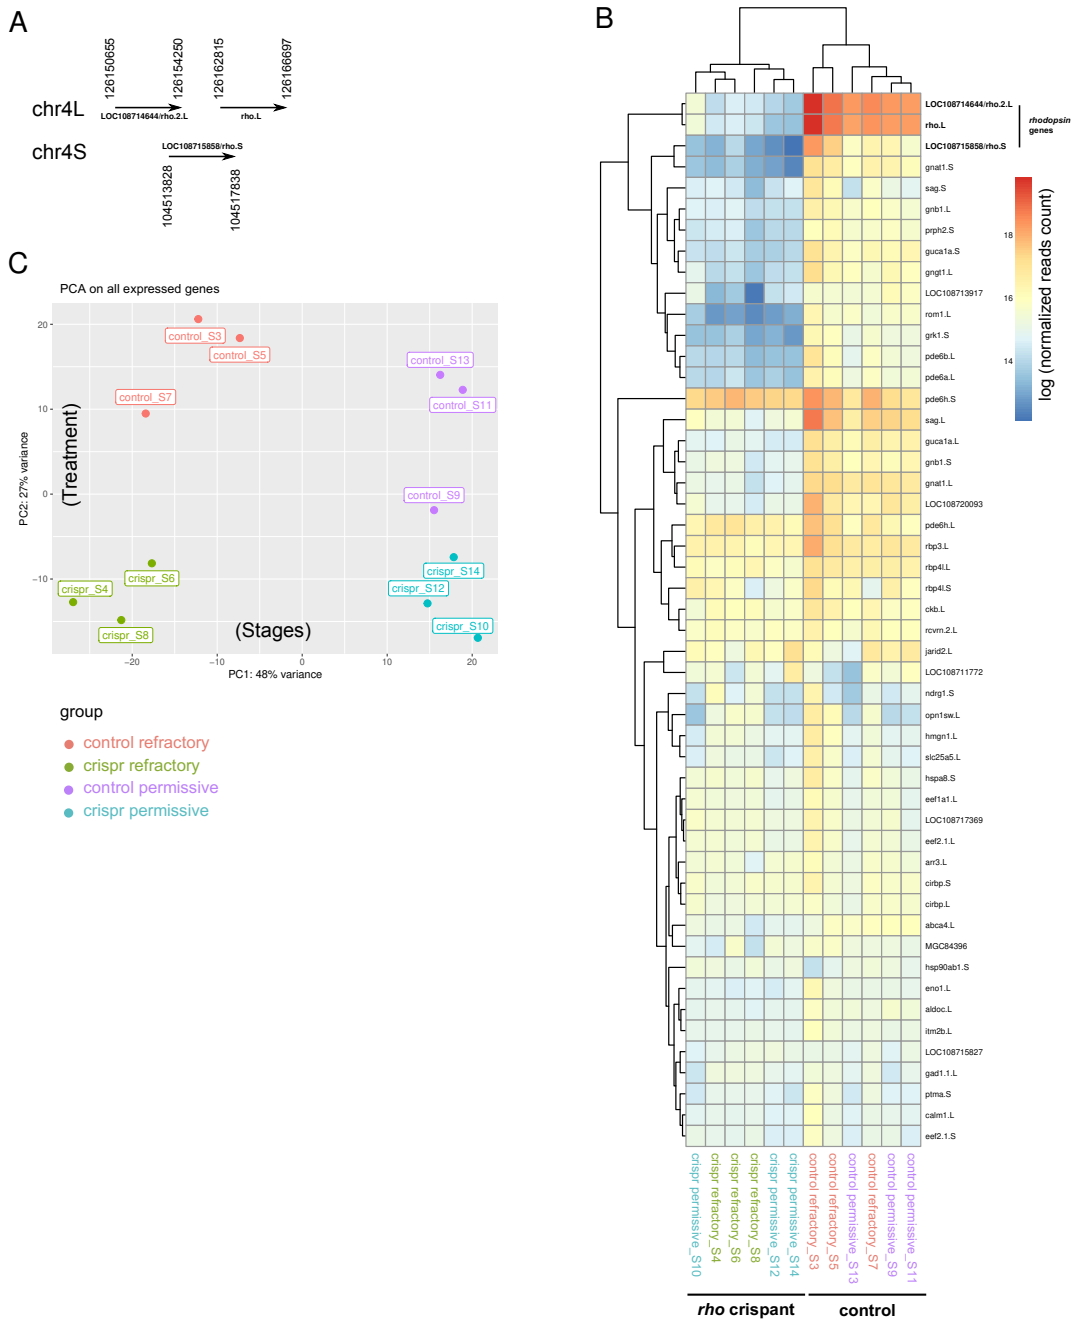

**Figure S2. Mapping data.** Following adapter trimming, the RNAseq data were mapped to *Xenopus laevis* genome 9.2 and uniquely mapped reads were assigned to genes using the annotation available on Xenbase. **(A)** Chromosomal locations of the three *rho* loci targeted by CRISPR/Cas9. **(B)** Clustered heatmap of the 50 most expressed genes of the RNAseq dataset. It highlights the clear separation between *rho*-crippant and control tadpoles. **(C)** Principal component analysis (PCA) on expressed genes of the RNAseq dataset. PC1 (48%) is most likely associated with the developmental stage of the tadpoles, while PC2 (27%) is most likely associated with the treatment condition. Components 1 and 2 explain together 75 % of the variance.



Figure S4

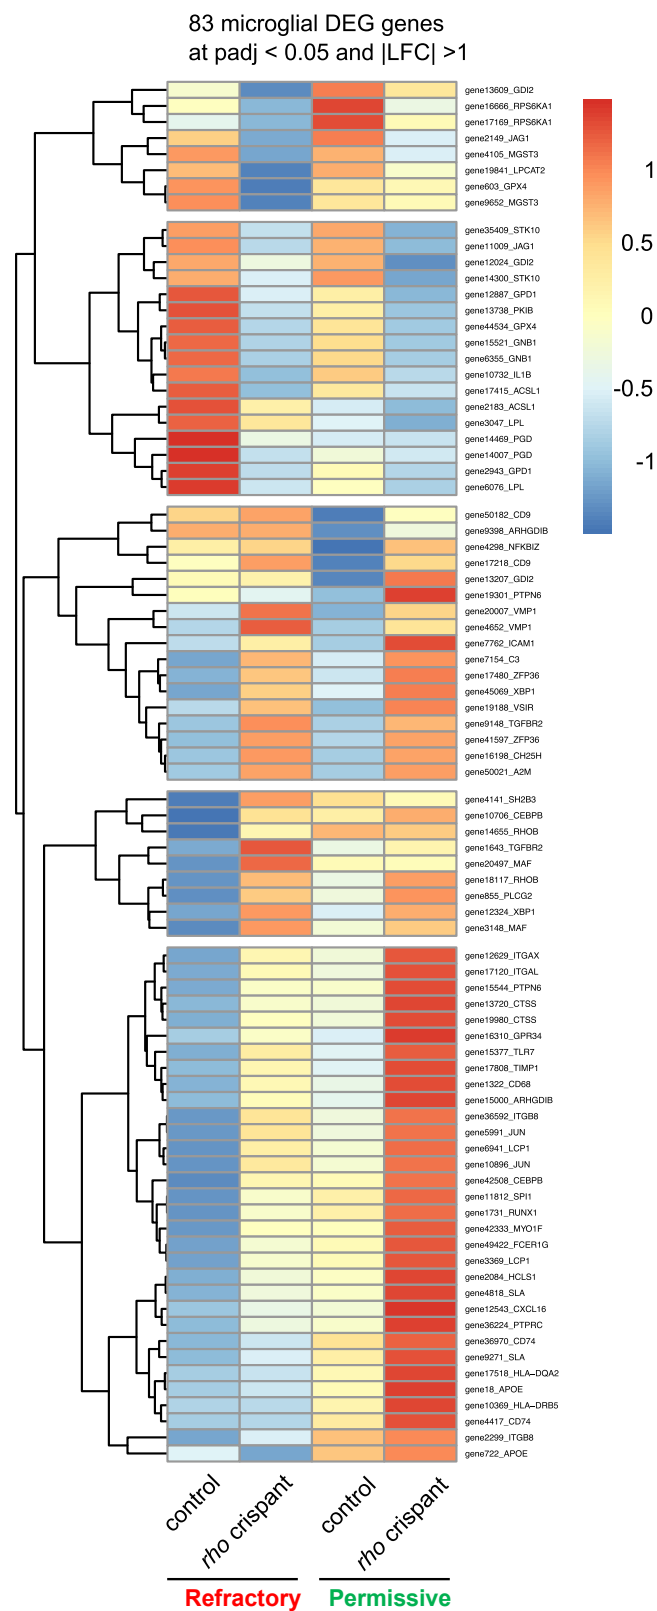

Figure S4. Heatmap of differentially expressed genes. Clustered heatmap of differentially expressed genes belonging to the microglia molecular signature. Enlargement of the cluster of interest is shown in Fig. 1D.

Figure S5

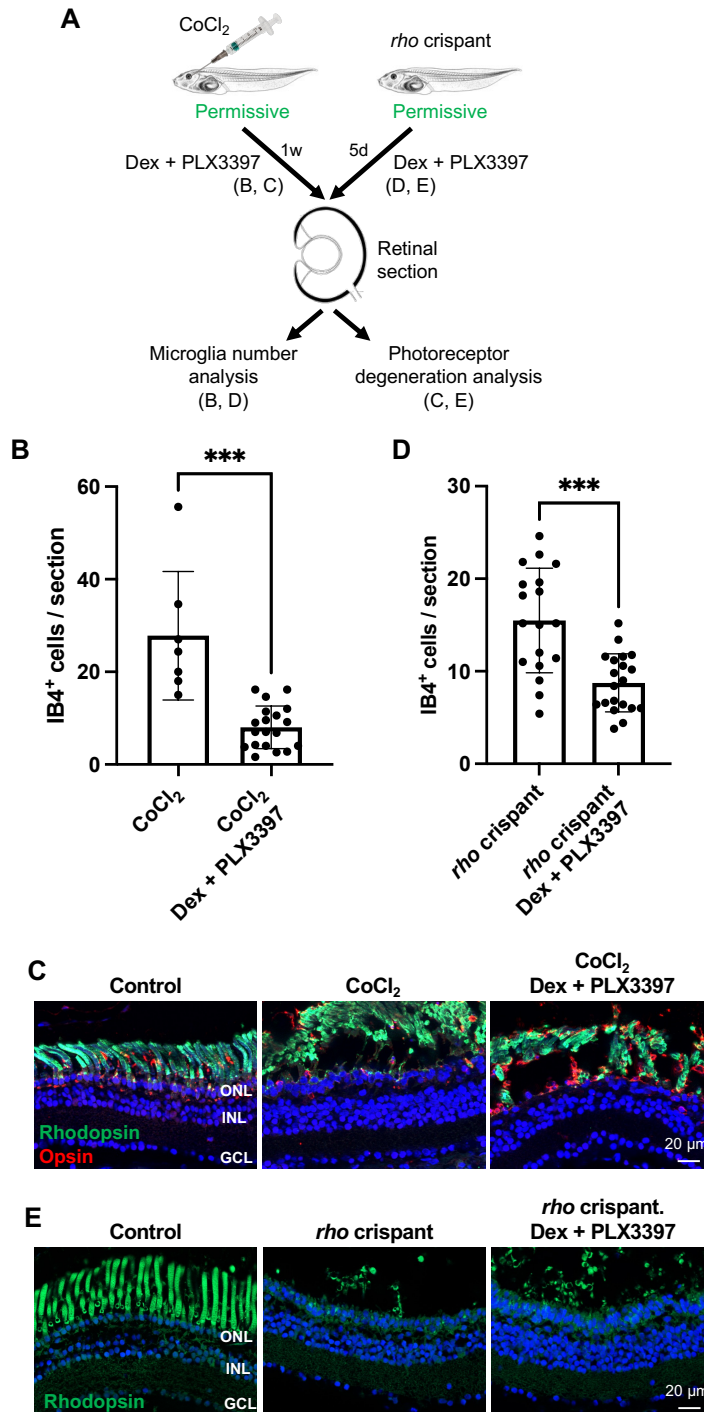

**Figure S5. Dex plus PLX3397 treatment efficiently decreases the number of microglial cells in *CoCl<sub>2</sub>*-injected or *rho* crisprant tadpoles, without impacting retinal degeneration. (A)** Outline of the experimental procedure used in (B-E). Stage 56/62 (permissive stage) *CoCl<sub>2</sub>*-injected (B, C) or *rho* crisprant (D, E) tadpoles were soaked in PLX3397 plus Dex solution for 5 days (5d) or 1 week (1w) as indicated, starting one day before *CoCl<sub>2</sub>* injection. They were then processed for immunolabeling on retinal sections. **(B, D)** Quantification of IB4-positive cells (microglia). **(C, E)** Representative images of retinal sections labeled for Opsins (cones) and/or Rhodopsin (rods). Nuclei are counterstained with Hoechst. Data are represented as mean  $\pm$  SEM, and each point represents one retina. \*\*\* $P < 0.001$  (Mann-Whitney test). GCL, ganglion cell layer; INL, inner nuclear layer; ONL, outer nuclear layer.

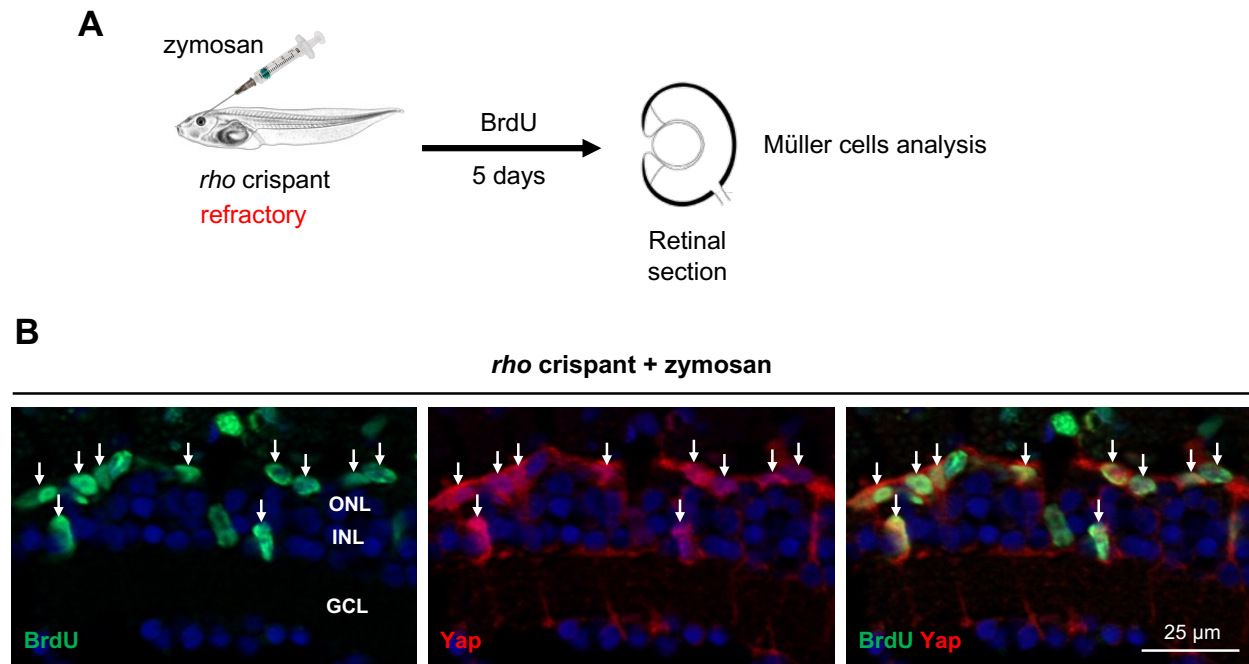

**Figure S6. Proliferative cells upon zymosan injection at the refractory stage are Müller cells. (A)** Outline of the experimental procedure used in (B). Stage 48/49 (refractory) *rho* crispant tadpoles were intraocularly injected with zymosan and then exposed to BrdU solution for 5 days before being processed for immunolabeling on retinal sections. **(B)** Representative images of retinal sections co-labeled for BrdU and Yap. Arrows point to double-labeled cells. GCL, ganglion cell layer; INL, inner nuclear layer; ONL, outer nuclear layer.

Figure S7

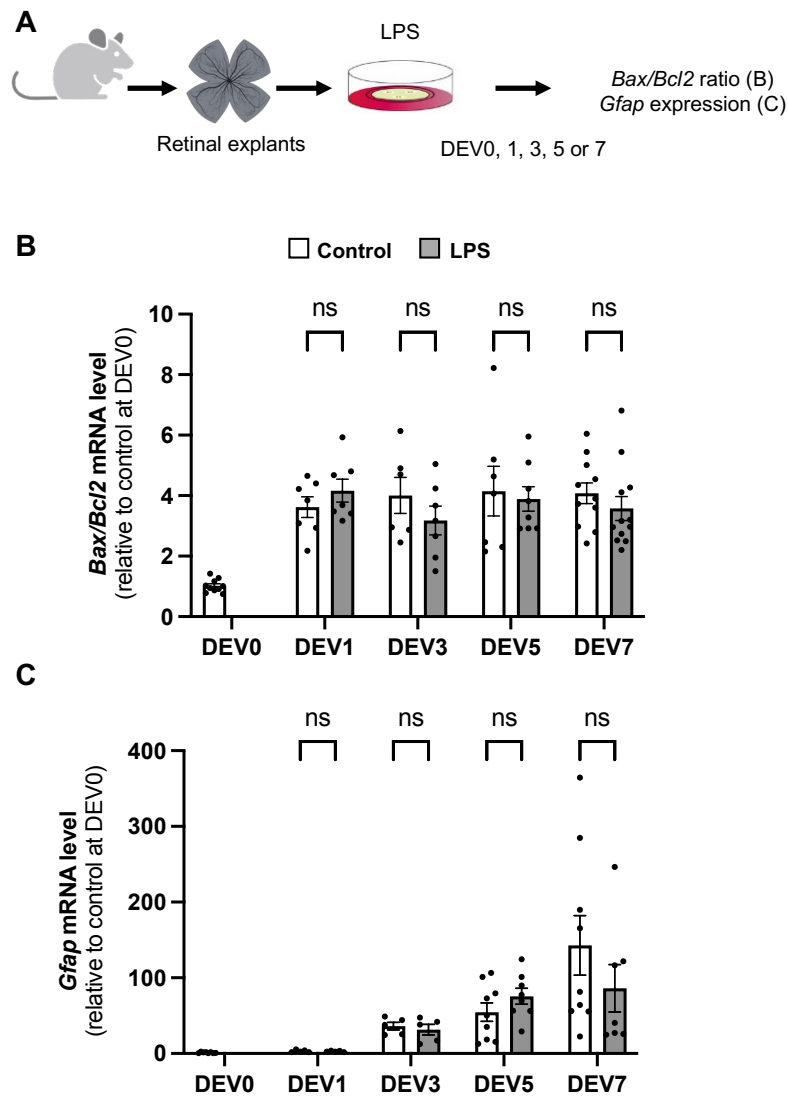

**Figure S7. Absence of toxicity of LPS on retinal cells in mouse explants. (A)** Outline of the experimental procedure used in (B, C). Retinas from wild-type mice were flattened and cultured for up to 7 days in the presence of LPS. They were then processed for qPCR analysis. **(B, C)** qPCR analysis of *Bax/Bcl2* expression ratio (B) or *Gfap* expression (C) in control and LPS-treated retinal explants at different culture time points relative to uncultured control condition (DEVO). Data are represented as mean  $\pm$  SEM, and each point represents one retinal explant. ns: non-significant (Mann-Whitney test).



Figure S8

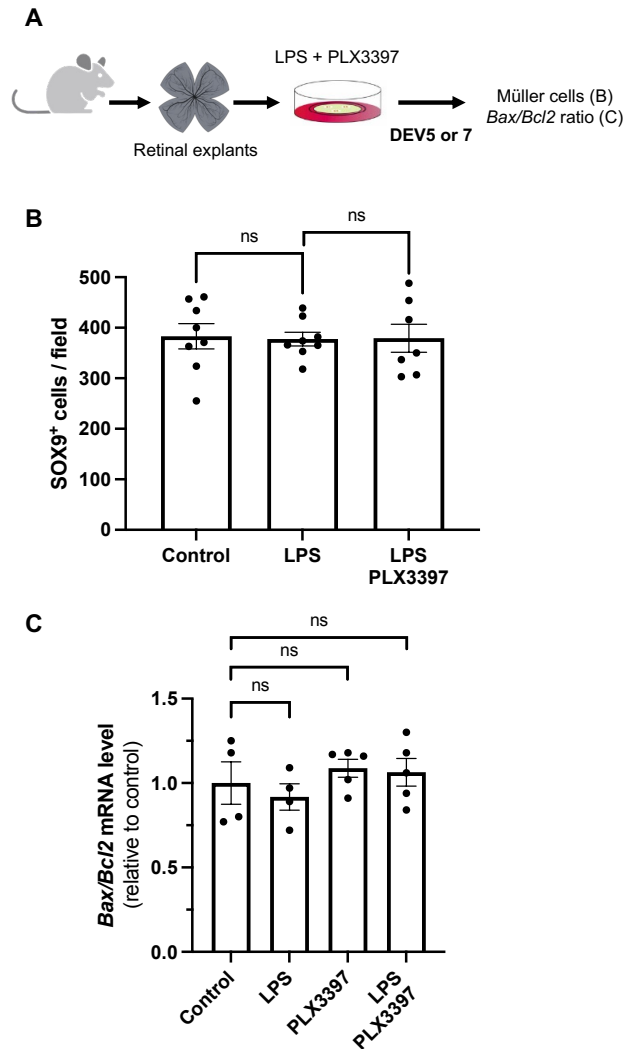

**Figure S8. Impact of LPS plus PLX3397 treatment on the survival of mouse Müller glial cells. (A)** Outline of the experimental procedure used in (B, C). Retinas from wild-type mice were flattened and cultured in the presence of LPS, PLX3397 or LPS plus PLX3397. Retinal explants were processed for immunostaining analysis at DEV7 (B) or processed for qPCR analysis at DEV5 (C). **(B)** Quantification of SOX9-positive cells (Müller cells). **(C)** Retinal qPCR analysis of *Bax/Bcl2* expression ratio. Data are represented as mean ± SEM, and each point represents one retinal explant. ns: non-significant (Mann-Whitney test).

Figure S9

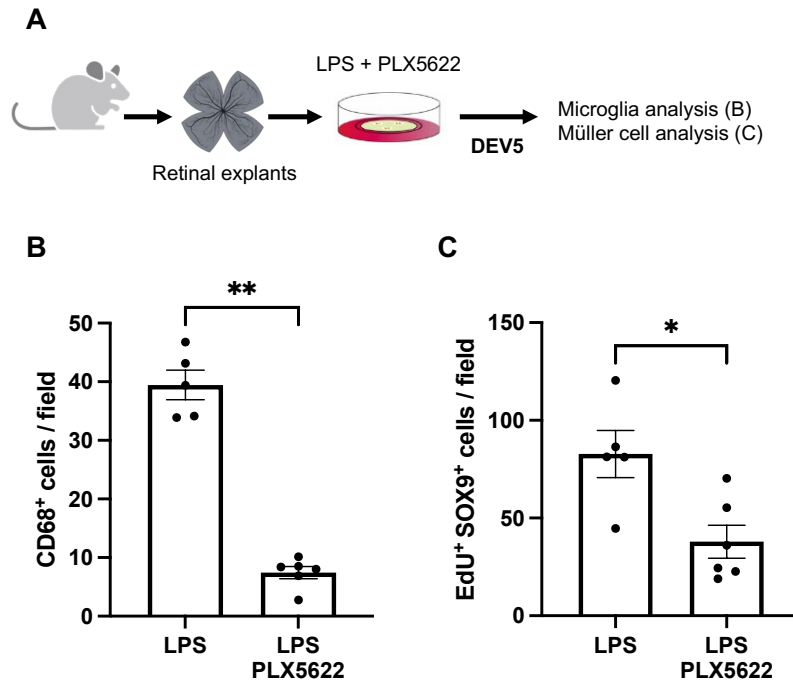

**Figure S9. PLX5622 counteracts the LPS-driven proliferation of Müller glial cells in mouse retinal explants.** (A) Outline of the experimental procedure used in (B, C). Retinas from wild-type mice were flattened and cultured for 5 days in the presence of EdU plus LPS, or plus LPS and PLX5622. Retinal explants were processed for immunostaining analysis at DEV5. (B, C) Quantification of CD68-positive cells (activated microglia, B) or double EdU- and SOX9-positive cells (proliferative Müller cells, C) in LPS or LPS plus PLX5622-treated retinal explants. Data are represented as mean  $\pm$  SEM, and each point represents one retinal explant. \* $P < 0.05$ , \*\* $P < 0.01$  (Mann-Whitney test).

Supplementary Table S1.

## Refractory Stage

| ID         | Description                                            | setSize | Enrichment Score | Normalized Enrichment Score | pvalue   | p.adjust | qvalue   |
|------------|--------------------------------------------------------|---------|------------------|-----------------------------|----------|----------|----------|
| GO:0009583 | <u>Detection of light stimulus</u>                     | 45      | -0,82            | -2,98                       | 1,00E-15 | 4,96E-13 | 3,23E-13 |
| GO:0019646 | Aerobic electron transport chain                       | 66      | -0,75            | -2,95                       | 1,00E-15 | 4,96E-13 | 3,23E-13 |
| GO:0009584 | <u>Detection of visible light</u>                      | 36      | -0,85            | -2,92                       | 1,00E-15 | 4,96E-13 | 3,23E-13 |
| GO:0042773 | ATP synthesis coupled electron transport               | 71      | -0,72            | -2,89                       | 1,00E-15 | 4,96E-13 | 3,23E-13 |
| GO:0042775 | Mitochondrial ATP synthesis coupled electron transport | 71      | -0,72            | -2,89                       | 1,00E-15 | 4,96E-13 | 3,23E-13 |
| GO:0022904 | Respiratory electron transport chain                   | 88      | -0,69            | -2,83                       | 1,00E-15 | 4,96E-13 | 3,23E-13 |
| GO:0002521 | <b>Leukocyte differentiation</b>                       | 339     | 0,47             | 2,40                        | 1,02E-15 | 4,96E-13 | 3,23E-13 |
| GO:0048858 | Cell projection morphogenesis                          | 453     | 0,44             | 2,28                        | 3,63E-15 | 1,38E-12 | 8,98E-13 |
| GO:0032990 | Cell part morphogenesis                                | 469     | 0,43             | 2,25                        | 3,57E-15 | 1,38E-12 | 8,98E-13 |
| GO:0002088 | <u>Lens development in camera-type eye</u>             | 61      | 0,76             | 2,97                        | 4,64E-15 | 1,59E-12 | 1,03E-12 |

## Permissive Stage

| ID         | Description                                         | setSize | Enrichment Score | Normalized Enrichment Score | pvalue   | p.adjust | qvalue   |
|------------|-----------------------------------------------------|---------|------------------|-----------------------------|----------|----------|----------|
| GO:0050776 | <b>Regulation of immune response</b>                | 382     | 0,59             | 2,14                        | 2,74E-15 | 9,37E-12 | 7,46E-12 |
| GO:0002684 | <b>Positive regulation of immune system process</b> | 465     | 0,56             | 2,05                        | 1,11E-13 | 1,90E-10 | 1,51E-10 |
| GO:0009583 | <u>Detection of light stimulus</u>                  | 45      | -0,86            | -2,61                       | 1,15E-12 | 1,31E-09 | 1,05E-09 |
| GO:0045087 | <b>Innate immune response</b>                       | 343     | 0,59             | 2,10                        | 2,95E-12 | 2,17E-09 | 1,73E-09 |
| GO:0045321 | <b>Leukocyte activation</b>                         | 463     | 0,54             | 1,99                        | 3,17E-12 | 2,17E-09 | 1,73E-09 |
| GO:0098542 | <b>Defense response to other organism</b>           | 442     | 0,54             | 1,99                        | 7,51E-12 | 4,28E-09 | 3,41E-09 |
| GO:0009584 | <u>Detection of visible light</u>                   | 36      | -0,87            | -2,56                       | 1,53E-11 | 7,46E-09 | 5,94E-09 |
| GO:0042110 | <b>T cell activation</b>                            | 260     | 0,61             | 2,13                        | 2,39E-11 | 1,02E-08 | 8,14E-09 |
| GO:0007602 | <u>Phototransduction</u>                            | 33      | -0,87            | -2,53                       | 4,39E-11 | 1,67E-08 | 1,33E-08 |
| GO:0002263 | <b>Cell activation involved in immune response</b>  | 138     | 0,69             | 2,25                        | 5,61E-11 | 1,92E-08 | 1,53E-08 |

**Table S1. GSEA top 5 most enriched or depleted biological processes at refractory or permissive stages between *rho* crispants and control retinas.** Log<sub>2</sub>FC ranked gene list from differential analysis performed at refractory or permissive stages. Biological processes pertaining to the visual system are underlined and biological processes pertaining to inflammatory response are in bold.

**Supplementary Table S2.****Primary antibodies and lectin used in *Xenopus***

| Antigen                                  | Host species | Distributor       | Reference | Dilution |
|------------------------------------------|--------------|-------------------|-----------|----------|
| BrdU                                     | Rat          | Abcam             | ab6326    | 1/400    |
| BrdU                                     | Mouse        | Becton Dickinson  | 347580    | 1/100    |
| Isolectin B4 – Alexa Fluor 594 Conjugate |              | Thermo Fisher Sc. | I21413    | 1/500    |
| S-Opsin                                  | Rabbit       | Millipore         | AB5407    | 1/500    |
| M-Opsin                                  | Rabbit       | Millipore         | AB5405    | 1/500    |
| PCNA                                     | Mouse        | DAKO              | M0879     | 1/500    |
| Rhodopsin                                | Mouse        | Millipore         | MABN15    | 1/1000   |
| Yap                                      | Rabbit       | Abcam             | ab52771   | 1/50     |

**Primary antibodies used in mice**

| Antigen | Host species | Distributor | Reference | Dilution |
|---------|--------------|-------------|-----------|----------|
| CD68    | Rat          | Bio-Rad     | MCA1957GA | 1/300    |
| SOX9    | Rabbit       | Abcam       | ab185966  | 1/300    |

**Secondary antibodies**

| Antibody                   | Host | Company          | Reference | Dilution |
|----------------------------|------|------------------|-----------|----------|
| Anti-mouse IgG, Alexa 488  | Goat | ThermoFisher Sc. | A-11001   | 1/1000   |
| Anti-rabbit IgG, Alexa 555 | Goat | ThermoFisher Sc. | A-21428   | 1/1000   |
| Anti-rat IgG, Alexa 555    | Goat | ThermoFisher Sc. | A-21434   | 1/1000   |
| Anti-rat IgG, Alexa 647    | Goat | ThermoFisher Sc. | A-21247   | 1/500    |

**Table S2. List of antibodies.**

Supplementary Table S3.

Primers for qPCR (*Xenopus*)

| Target           | Forward (5'-3')          | Reverse (5'-3')         |
|------------------|--------------------------|-------------------------|
| <i>anxA1</i>     | TGCACTGCTGAAGAATCGG      | TTGCTGTCGTTCCAGAGTTGG   |
| <i>cd68</i>      | AGAAATGGAGGCCCTTTGG      | CTTGGCGGGTCCATAGTTGA    |
| <i>eef1a1</i>    | TGGTGGCATCGACAAGAGAAC    | CCACCTTCACGCTCTGCCTTC   |
| <i>il1-beta</i>  | CATTCCCATGGAGGGCTACA     | TGACTGCCACTGAGCAGCAT    |
| <i>il10</i>      | TGCTGGATCTTAAGCACACCCTGA | TGTACAGGCCTTGTTACGCATCT |
| <i>odc1</i>      | GCTTCTGGAGCGGGCAAAGGA    | CCAAGCTCAGCCCCCATGTCA   |
| <i>socs3</i>     | CCGGTGCCTAGGAAGAAGA      | CCTTAAAGCAGCCECCATC     |
| <i>tnf-alpha</i> | GCTCAAGGATAACTCCATCG     | AACCAAGTGGCACCTGAATG    |

Primers for qPCR (mice)

| Target           | Forward (5'-3')         | Reverse (5'-3')          |
|------------------|-------------------------|--------------------------|
| <i>Ascl1</i>     | TCTCCTGGGAATGGACTTTG    | GGTTGGCTGTCGGTTTGTT      |
| <i>Bax</i>       | AGGCCTCCTCTCCTACTTCG    | CTCAGCCCATCTTCTTCCAG     |
| <i>Bcl2</i>      | GGACTTGAAGTGCCATTGGT    | AGCCCCTCTGTGACAGCTTA     |
| <i>Ccl2</i>      | GAAGGAATGGGTCCAGACAT    | ACGGGTCAACTTCACATTCA     |
| <i>Gfap</i>      | CCAGTTACCAGGAGGCACTTG   | CGATGTCCAGGGCTAGCTTAA    |
| <i>Il1-beta</i>  | GCACTACAGGCTCCGAGATGAAC | TTGTCGTTGCTTGGTTCTCCTTGT |
| <i>Il-6</i>      | GCCTTCTTGGGACTGATGCTGGT | TCCTCTGTGAAGTCTCCTCTCCG  |
| <i>Rps26</i>     | CCCAAGGATAAGGCCATCAAG   | AAGCACGTAGGCGTCGAAGA     |
| <i>Srp72</i>     | GCACTCATGGTAGCGTTCCA    | CACCCAGCAGACAGACAAACTG   |
| <i>Tbp</i>       | CACAGGAGCCAAGAGTGAAGAAC | ATCACAGCTCCCCACCATGT     |
| <i>Tnf-alpha</i> | AAGTCAACCTCTCTGCC       | TCCAAAGTAGACCTGCCCG      |

Table S3. List of primers.

Supplementary Table S4.

| Sample | Condition                      | Raw reads | Uniquely mapped reads | Mapped length |
|--------|--------------------------------|-----------|-----------------------|---------------|
| S13    | Permissive control             | 37519396  | 32584008              | 294.26        |
| S11    | Permissive control             | 55667307  | 48249728              | 294.84        |
| S9     | Permissive control             | 37134505  | 32022113              | 294.80        |
| S14    | Permissive <i>rho</i> crispant | 55470492  | 48437975              | 294.47        |
| S12    | Permissive <i>rho</i> crispant | 42054660  | 36682819              | 293.81        |
| S10    | Permissive <i>rho</i> crispant | 44074067  | 38604360              | 293.86        |
| S3     | Refractory control             | 31671086  | 27404733              | 294.53        |
| S5     | Refractory control             | 38540883  | 33584757              | 294.89        |
| S7     | Refractory control             | 48274813  | 41542934              | 294.17        |
| S4     | Refractory <i>rho</i> crispant | 49009929  | 42877033              | 294.80        |
| S6     | Refractory <i>rho</i> crispant | 55657807  | 48465273              | 294.08        |
| S8     | Refractory <i>rho</i> crispant | 50338069  | 44186472              | 293.79        |

Table S4. RNAseq samples.

## Supplementary Table S5.

**Figure 1A**

| BrdU+ cells / section |                     |         |                     |         |                     |         |                     |
|-----------------------|---------------------|---------|---------------------|---------|---------------------|---------|---------------------|
| Control               | <i>rho</i> crispant | Control | <i>rho</i> crispant | Control | <i>rho</i> crispant | Control | <i>rho</i> crispant |
| 0.00                  | 1.44                | 0.80    | 4.22                | 1.25    | 4.38                | 5.29    | 46.00               |
| 0.20                  | 1.40                | 1.20    | 3.10                | 1.50    | 4.88                | 6.29    | 134.60              |
| 0.60                  | 0.70                | 1.60    | 2.50                | 1.50    | 7.28                | 5.67    | 75.67               |
| 0.25                  | 0.38                | 0.60    | 3.80                | 1.75    | 8.95                | 6.00    | 51.50               |
| 0.00                  | 0.40                | 2.20    | 6.40                | 2.50    | 9.88                | 6.00    | 160.00              |
| 0.00                  | 1.25                | 1.60    | 5.63                | 2.88    | 10.99               | 5.17    | 114.00              |
| 0.25                  | 1.22                | 0.00    | 6.44                | 3.88    | 23.13               |         |                     |
|                       |                     | 0.00    | 4.33                | 4.63    |                     |         |                     |
|                       |                     |         | 5.80                |         |                     |         |                     |
|                       |                     |         | 3.40                |         |                     |         |                     |

**Figure 2A**

| IB4+ cells / section |       |       |       |       |       |      |      |
|----------------------|-------|-------|-------|-------|-------|------|------|
| Stages               |       |       |       |       |       |      |      |
| 45/46                | 47/48 | 49/50 | 51/52 | 53/54 | 55/56 | 60   | 66   |
| 0.125                | 0     | 0     | 1.83  | 1.33  | 3     | 11.6 | 13.8 |
| 0                    | 0.166 | 0.5   | 1     | 3.5   | 2.16  | 10.7 | 9    |
| 0                    | 0     | 0.5   | 1     | 1.83  | 3.3   | 9.5  | 10.3 |
| 0.25                 | 0.166 | 0.833 | 1.17  | 1.66  | 3.1   | 7.8  | 6.1  |
| 0.125                | 0.33  | 1.16  | 1.17  | 1.33  | 1.83  | 9.3  |      |
| 0.25                 | 0.83  | 1     | 0.6   | 1.5   | 3     | 6.5  |      |
| 0.125                | 0     | 0.5   | 0.5   | 2.16  | 2.67  |      |      |

**Figure 3G**

| -ΔCT        |                   |                 |                   |                  |                   |
|-------------|-------------------|-----------------|-------------------|------------------|-------------------|
| <i>anx1</i> |                   | <i>il1-beta</i> |                   | <i>il10</i>      |                   |
| Control     | CoCl <sub>2</sub> | Control         | CoCl <sub>2</sub> | Control          | CoCl <sub>2</sub> |
| -4.40       | -3.03             | -15.42          | -13.13            | -12.20           | -10.94            |
| -6.01       | -4.42             | -13.56          | -11.61            | -11.98           | -11.43            |
| -9.04       | -4.46             | -11.12          | -11.33            | -11.62           | -10.93            |
| -8.56       | -4.89             | -11.93          | -10.41            | -11.14           | -10.45            |
| -8.75       | -5.22             | -13.90          | -12.60            | -11.79           | -10.67            |
| -4.33       | -4.20             | -12.32          | -11.34            | -13.37           | -12.02            |
| -9.82       | -4.82             | -12.73          | -11.36            | -12.04           | -10.72            |
| -8.99       | -3.67             |                 |                   | -11.24           | -10.89            |
| <i>sox3</i> |                   | <i>cd68</i>     |                   | <i>tnf-alpha</i> |                   |
| Control     | CoCl <sub>2</sub> | Control         | CoCl <sub>2</sub> | Control          | CoCl <sub>2</sub> |
| -7.29       | -3.93             | -7.04           | -3.79             | -11.99           | -8.69             |
| -7.40       | -5.53             | -9.10           | -5.96             | -11.95           | -10.83            |
| -7.69       | -5.62             | -9.88           | -5.88             | -11.05           | -9.32             |
| -8.48       | -5.79             | -9.74           | -6.29             | -12.08           | -11.86            |
| -9.13       | -7.30             | -8.95           | -6.36             | -11.21           | -10.39            |
| -8.21       | -6.38             | -8.58           | -5.75             | -13.94           | -11.72            |
| -9.43       | -5.79             | -10.50          | -7.05             | -12.99           | -11.49            |
| -9.34       | -6.25             | -8.63           | -5.43             |                  |                   |

**Figure 3I**

| %PCNA+ cells / Yap+ cells |                   |
|---------------------------|-------------------|
| Control                   | CoCl <sub>2</sub> |
| 0                         | 96.88             |
| 0                         | 89.55             |
| 0                         | 93.44             |
| 0                         | 97.89             |
| 0                         | 94.19             |
| 0                         | 96.55             |
| 0                         | 96.15             |
| 0                         | 100.00            |
| 0                         | 77.50             |
| 0                         | 83.78             |

**Figure 2C**

| IB4+ cells / section |                     |         |                     |
|----------------------|---------------------|---------|---------------------|
| Control              | <i>rho</i> crispant | Control | <i>rho</i> crispant |
| 0.56                 | 0.00                | 4.18    | 16.20               |
| 0.00                 | 0.00                | 5.55    | 16.40               |
| 0.00                 | 0.10                | 5.50    | 13.08               |
| 0.00                 | 0.00                | 7.50    | 16.91               |
| 0.00                 | 0.90                | 0.58    | 14.83               |
| 0.25                 | 0.00                | 0.27    | 14.58               |
| 0.00                 | 1.00                | 2.27    | 13.92               |
| 0.00                 | 0.54                | 2.83    | 16.50               |
| 0.45                 | 0.38                | 1.67    |                     |
| 0.10                 | 0.73                | 4.17    |                     |
| 0.27                 | 0.14                | 8.18    |                     |
| 0.09                 | 2.67                | 9.27    |                     |
| 0.00                 | 0.91                |         |                     |
| 0.00                 | 1.10                |         |                     |
|                      | 0.25                |         |                     |
|                      | 0.73                |         |                     |
|                      | 0.10                |         |                     |

**Figure 3D**

| IB4+ cells / section |                   |         |                     |
|----------------------|-------------------|---------|---------------------|
| Control              | CoCl <sub>2</sub> | Control | <i>rho</i> crispant |
| 63.95                | 305.56            | 26.67   | 143.33              |
| 35.53                | 540.06            | 8.33    | 88.33               |
| 35.53                | 312.67            | 16.67   | 113.33              |
| 49.74                | 312.67            | 21.67   | 131.67              |
| 42.64                | 376.62            | 5.00    | 103.33              |
| 42.64                | 461.89            | 0.00    |                     |
| 35.53                | 390.83            | 5.00    |                     |
| 71.06                | 390.83            |         |                     |
| 92.38                | 341.09            |         |                     |
| 63.95                | 312.67            |         |                     |
| 85.27                | 397.94            |         |                     |
| 71.06                | 397.94            |         |                     |
| 49.74                | 476.11            |         |                     |
| 85.27                | 717.71            |         |                     |
| 49.74                |                   |         |                     |
| 85.27                |                   |         |                     |
| 42.64                |                   |         |                     |
| 78.17                |                   |         |                     |
| 49.74                |                   |         |                     |
| 14.21                |                   |         |                     |
| 28.42                |                   |         |                     |
| 99.48                |                   |         |                     |
| 63.95                |                   |         |                     |
| 56.85                |                   |         |                     |
| 63.95                |                   |         |                     |
| 35.53                |                   |         |                     |
| 56.85                |                   |         |                     |
| 56.85                |                   |         |                     |

**Figure 3M**

| PCNA+ IB4+ cells / section |                   |                                    |
|----------------------------|-------------------|------------------------------------|
| Control                    | CoCl <sub>2</sub> | CoCl <sub>2</sub><br>Dex + PLX3397 |
| 3.40                       | 285.20            | 134.60                             |
| 4.20                       | 266.80            | 119.80                             |
| 10.40                      | 330.20            | 22.60                              |
| 0.00                       | 300.20            | 20.00                              |
| 1.00                       | 287.40            | 97.00                              |
| 1.00                       | 244.80            | 132.00                             |
| 0.80                       | 91.00             | 190.00                             |
| 6.20                       | 150.20            | 120.00                             |
| 0.20                       | 341.60            | 38.40                              |
| 1.33                       | 331.20            | 125.60                             |
|                            | 198.40            | 74.00                              |
|                            | 179.00            | 105.40                             |

| Figure 3O                  |                                      |
|----------------------------|--------------------------------------|
| PCNA+ IB4+ cells / section |                                      |
| <i>rho</i> crispant        | <i>rho</i> crispant<br>Dex + PLX3397 |
| 90.60                      | 134.00                               |
| 86.20                      | 113.60                               |
| 127.80                     | 151.60                               |
| 166.20                     | 135.00                               |
| 138.40                     | 100.20                               |
| 174.40                     | 99.40                                |
| 264.80                     | 98.60                                |
| 263.40                     | 148.20                               |
| 194.00                     | 79.80                                |
| 234.20                     | 102.40                               |
| 189.00                     | 116.60                               |
| 128.20                     | 104.80                               |
| 237.00                     | 132.60                               |
| 100.60                     | 137.20                               |
| 215.20                     | 123.00                               |
| 231.40                     | 220.00                               |
| 220.80                     | 88.00                                |
| 184.60                     | 60.40                                |
|                            | 83.40                                |
|                            | 101.40                               |

| Figure 4B            |                   |                                       |
|----------------------|-------------------|---------------------------------------|
| IB4+ cells / section |                   |                                       |
| Control              | CoCl <sub>2</sub> | CoCl <sub>2</sub><br>Dex +<br>PLX3397 |
| 0.40                 | 18.00             | 6.40                                  |
| 3.60                 | 14.00             | 4.67                                  |
| 1.40                 | 11.40             | 7.20                                  |
| 1.00                 | 9.80              | 9.80                                  |
| 0.20                 | 31.60             | 3.60                                  |
| 1.40                 | 8.00              | 7.20                                  |
| 1.80                 | 9.20              | 5.20                                  |
| 0.00                 | 9.20              | 8.40                                  |
| 3.80                 |                   | 0.20                                  |
| 0.80                 |                   | 1.60                                  |
| 0.00                 |                   | 2.00                                  |
| 0.00                 |                   | 1.80                                  |
| 0.80                 |                   | 3.40                                  |

| Figure 4C                 |                   |                                       |
|---------------------------|-------------------|---------------------------------------|
| IB4+ IB4- cells / section |                   |                                       |
| Control                   | CoCl <sub>2</sub> | CoCl <sub>2</sub><br>Dex +<br>PLX3397 |
| 0.40                      | 120.50            | 15.40                                 |
| 1.00                      | 42.60             | 1.33                                  |
| 0.00                      | 62.00             | 4.00                                  |
| 1.50                      | 49.20             | 2.80                                  |
| 0.60                      | 145.40            | 5.60                                  |
| 1.40                      | 51.80             | 35.40                                 |
| 2.60                      | 74.20             | 4.80                                  |
| 0.00                      | 107.60            | 3.60                                  |
| 2.80                      |                   | 9.20                                  |
| 1.80                      |                   | 3.60                                  |
| 1.00                      |                   | 4.40                                  |
| 1.60                      |                   | 2.60                                  |
| 2.00                      |                   | 4.00                                  |

| Figure 4F            |         |
|----------------------|---------|
| IB4+ cells / section |         |
| Control              | Zymosan |
| 3.14                 | 18.86   |
| 3.86                 | 19.86   |
| 3.14                 | 19.88   |
| 2.43                 | 9.71    |
| 3.83                 | 28.86   |

| Figure 4G                 |         |
|---------------------------|---------|
| IB4+ IB4- cells / section |         |
| Control                   | Zymosan |
| 7.43                      | 11.29   |
| 4.57                      | 10.71   |
| 3.29                      | 16.25   |
| 5.00                      | 6.71    |
| 4.00                      | 11.00   |

| Figure 4I            |          |
|----------------------|----------|
| IB4+ cells / section |          |
| Control              | Bacteria |
| 6.33                 | 37.60    |
| 7.00                 | 41.33    |
| 1.67                 | 22.00    |
| 3.25                 | 27.00    |
| 6.33                 | 19.00    |
| 2.75                 | 22.67    |
| 4.71                 | 29.25    |
| 2.00                 | 20.33    |
|                      | 13.50    |
|                      | 38.43    |
|                      | 25.00    |
|                      | 31.80    |
|                      | 16.29    |
|                      | 14.20    |
|                      | 29.00    |
|                      | 27.00    |
|                      | 17.00    |
|                      | 25.50    |
|                      | 25.25    |
|                      | 17.00    |
|                      | 30.67    |
|                      | 23.67    |

| Figure 4J                 |          |
|---------------------------|----------|
| IB4+ IB4- cells / section |          |
| Control                   | Bacteria |
| 7.67                      | 8.70     |
| 2.00                      | 3.00     |
| 1.83                      | 11.75    |
| 3.00                      | 6.00     |
| 13.67                     | 16.00    |
| 2.75                      | 6.33     |
| 4.00                      | 3.00     |
| 3.50                      | 6.67     |
|                           | 6.00     |
|                           | 12.14    |
|                           | 10.50    |
|                           | 9.60     |
|                           | 6.86     |
|                           | 5.00     |
|                           | 15.00    |
|                           | 16.50    |
|                           | 4.33     |
|                           | 7.50     |
|                           | 6.38     |
|                           | 4.33     |
|                           | 6.67     |
|                           | 2.33     |

| Figure 5B                |         |       |       |       |       |       |       |       |       |       |       |      |        |        |        |        |       |       |       |       |       |       |        |
|--------------------------|---------|-------|-------|-------|-------|-------|-------|-------|-------|-------|-------|------|--------|--------|--------|--------|-------|-------|-------|-------|-------|-------|--------|
| EdU+ Sox9+ cells / field |         |       |       |       |       |       |       |       |       |       |       |      |        |        |        |        |       |       |       |       |       |       |        |
|                          | Control |       |       |       |       |       |       |       |       |       |       |      | LPS    |        |        |        |       |       |       |       |       |       |        |
| DEV0                     | 0.00    | 0.00  | 0.00  | 0.00  |       |       |       |       |       |       |       |      |        |        |        |        |       |       |       |       |       |       |        |
| DEV1                     | 0.00    | 0.00  | 0.00  | 0.00  | 0.00  |       |       |       |       |       |       |      |        |        |        |        |       |       |       |       |       |       |        |
| DEV3                     | 7.33    | 2.14  | 3.75  | 0.25  | 0.75  |       |       |       |       |       |       |      |        |        |        |        |       |       |       |       |       |       |        |
| DEV5                     | 28.63   | 15.38 | 33.00 | 18.13 | 8.63  | 3.00  | 9.00  | 12.75 | 10.25 |       |       |      |        |        |        |        |       |       |       |       |       |       |        |
| DEV7                     | 21.88   | 30.14 | 18.33 | 9.75  | 14.20 | 13.60 | 20.91 | 14.80 | 19.40 | 13.75 | 23.00 | 9.50 | 108.40 | 163.38 | 180.89 | 115.00 | 43.50 | 53.42 | 51.20 | 24.22 | 58.00 | 82.75 | 113.00 |



**Figure 5D**

| CD68+ cells / field |                |
|---------------------|----------------|
| LPS                 | LPS<br>PLX3397 |
| 56.92               | 9.08           |
| 51.08               | 12.19          |
| 62.75               | 11.44          |
| 44.50               | 10.06          |
| 39.00               | 13.58          |
| 69.17               | 14.38          |
| 68.69               | 12.63          |
| 30.75               |                |

**Figure 5E**

| EdU+ Sox9+ cells / field |        |                |
|--------------------------|--------|----------------|
| Control                  | LPS    | LPS<br>PLX3397 |
| 24.00                    | 79.25  | 36.50          |
| 28.75                    | 149.00 | 16.50          |
| 28.25                    | 59.50  | 2.75           |
| 32.25                    | 61.75  | 25.50          |
| 37.75                    | 108.25 | 55.75          |
| 62.00                    | 77.50  | 47.00          |
| 60.50                    | 182.75 | 47.75          |
| 33.25                    | 65.00  | 36.50          |

**Figure 6A**

| Cc/2 RNA level |        |        |        |        |        |        |       |        |       |      |       |       |        |         |         |         |         |        |         |        |        |        |        |        |  |  |
|----------------|--------|--------|--------|--------|--------|--------|-------|--------|-------|------|-------|-------|--------|---------|---------|---------|---------|--------|---------|--------|--------|--------|--------|--------|--|--|
| Control        |        |        |        |        |        |        |       |        |       |      |       | LPS   |        |         |         |         |         |        |         |        |        |        |        |        |  |  |
| DEV1           | 158.64 | 185.04 | 268.29 | 542.75 | 588.25 | 140.88 | 84.56 | 103.69 |       |      |       |       | 838.51 | 1203.89 | 2224.19 | 334.67  | 2114.17 | 268.52 | 176.77  | 161.79 |        |        |        |        |  |  |
| DEV3           | 168.39 | 162.01 | 67.45  | 59.85  | 247.73 | 32.16  | 25.91 |        |       |      |       |       | 506.16 | 174.68  | 995.67  | 508.97  | 737.61  | 110.42 | 81.31   |        |        |        |        |        |  |  |
| DEV5           | 89.96  | 23.25  | 42.24  | 64.47  | 156.50 | 24.24  | 27.86 | 50.79  |       |      |       |       | 821.58 | 229.13  | 3380.42 | 357.97  | 122.80  | 198.26 | 122.72  | 108.42 |        |        |        |        |  |  |
| DEV7           | 37.62  | 13.54  | 32.61  | 100.06 | 12.00  | 72.87  | 29.88 | 25.82  | 62.98 | 8.90 | 10.22 | 16.13 | 491.54 | 511.80  | 417.70  | 2683.91 | 378.85  | 617.54 | 3806.31 | 600.40 | 784.05 | 135.76 | 134.40 | 125.67 |  |  |

  

| Il1-beta RNA level |      |      |      |      |       |      |      |      |      |      |      |      |       |       |       |       |       |       |       |       |       |      |      |      |  |  |
|--------------------|------|------|------|------|-------|------|------|------|------|------|------|------|-------|-------|-------|-------|-------|-------|-------|-------|-------|------|------|------|--|--|
| Control            |      |      |      |      |       |      |      |      |      |      |      | LPS  |       |       |       |       |       |       |       |       |       |      |      |      |  |  |
| DEV1               | 2.66 | 3.22 | 4.28 | 3.77 | 11.96 | 2.18 | 1.20 | 2.53 |      |      |      |      | 22.77 | 32.83 | 41.39 | 7.31  | 33.72 | 4.53  | 4.19  | 4.17  |       |      |      |      |  |  |
| DEV3               | 1.73 | 1.68 | 0.52 | 3.33 | 1.30  | 0.60 | 0.71 |      |      |      |      |      | 13.14 | 3.75  | 23.91 | 18.42 | 10.03 | 2.96  | 1.55  | 2.18  |       |      |      |      |  |  |
| DEV5               | 0.88 | 0.79 | 1.54 | 0.89 | 6.03  | 1.78 | 9.59 | 2.51 | 8.58 | 0.73 | 1.49 | 3.12 | 17.50 | 7.41  | 23.63 | 11.62 | 31.68 | 18.84 | 18.54 | 18.26 | 2.45  | 2.39 | 1.97 | 1.30 |  |  |
| DEV7               | 2.80 | 0.76 | 1.99 | 0.89 | 0.87  | 1.96 | 0.82 | 4.13 | 1.72 | 0.81 | 1.16 | 0.69 | 34.74 | 34.13 | 39.96 | 17.16 | 20.40 | 13.80 | 57.39 | 15.24 | 15.97 | 4.20 | 2.74 | 4.62 |  |  |

  

| Il6 RNA level |      |      |       |      |      |       |      |      |      |      |      |      |       |       |       |       |       |       |       |       |      |      |      |      |  |  |
|---------------|------|------|-------|------|------|-------|------|------|------|------|------|------|-------|-------|-------|-------|-------|-------|-------|-------|------|------|------|------|--|--|
| Control       |      |      |       |      |      |       |      |      |      |      |      | LPS  |       |       |       |       |       |       |       |       |      |      |      |      |  |  |
| DEV1          | 2.57 | 3.64 | 13.98 | 3.86 | 8.09 | 10.66 | 3.39 | 5.11 |      |      |      |      | 19.21 | 38.17 | 45.57 | 13.90 | 24.08 | 34.13 | 17.81 | 19.11 |      |      |      |      |  |  |
| DEV3          | 4.59 | 2.40 | 3.69  | 3.33 | 2.23 | 0.98  | 0.71 |      |      |      |      |      | 12.69 | 2.52  | 20.79 | 12.43 | 6.60  | 14.68 | 5.33  | 7.79  |      |      |      |      |  |  |
| DEV5          | 6.47 | 0.79 | 2.44  | 1.02 | 6.03 | 0.73  | 1.82 | 3.12 |      |      |      |      | 26.65 | 11.65 | 4.89  | 3.56  | 41.74 | 88.59 | 9.64  | 42.32 | 5.79 | 6.08 | 3.00 | 6.71 |  |  |
| DEV7          | 2.00 | 0.76 | 1.99  | 0.81 | 0.85 | 1.95  | 0.76 | 4.13 | 1.73 | 0.82 | 1.16 | 1.07 | 6.92  | 8.22  | 6.38  | 64.49 | 6.64  | 5.68  | 32.94 | 15.24 | 8.62 | 4.99 | 4.36 | 3.50 |  |  |

  

| Tnf-alpha RNA level |       |      |      |      |      |      |      |      |      |      |      |      |       |       |       |       |       |       |       |       |       |      |      |      |  |  |
|---------------------|-------|------|------|------|------|------|------|------|------|------|------|------|-------|-------|-------|-------|-------|-------|-------|-------|-------|------|------|------|--|--|
| Control             |       |      |      |      |      |      |      |      |      |      |      | LPS  |       |       |       |       |       |       |       |       |       |      |      |      |  |  |
| DEV1                | 3.26  | 4.38 | 2.80 | 9.68 | 4.80 | 0.65 | 0.50 | 1.29 |      |      |      |      | 2.93  | 11.76 | 19.84 | 7.74  | 4.55  | 0.72  | 0.66  | 0.98  |       |      |      |      |  |  |
| DEV3                | 3.38  | 1.68 | 1.22 | 2.62 | 2.89 | 1.00 | 0.71 |      |      |      |      |      | 19.70 | 5.53  | 18.36 | 32.23 | 9.38  | 3.13  | 1.64  | 1.72  |       |      |      |      |  |  |
| DEV5                | 3.27  | 2.63 | 7.35 | 1.82 | 4.75 | 8.06 | 8.96 | 5.79 | 6.68 | 0.73 | 1.49 | 3.15 | 31.18 | 8.24  | 25.23 | 47.04 | 24.58 | 40.52 | 19.09 | 14.15 | 2.66  | 2.16 | 3.82 | 2.40 |  |  |
| DEV7                | 45.94 | 2.91 | 6.47 | 5.13 | 2.59 | 9.53 | 4.28 | 4.13 | 6.24 | 0.81 | 1.16 | 1.91 | 55.47 | 16.48 | 16.78 | 20.43 | 32.14 | 13.62 | 12.02 | 15.24 | 16.14 | 5.62 | 4.54 | 4.34 |  |  |

**Figure 6C**

| EdU+ Sox9+ cells / field |        |           |       |                  |
|--------------------------|--------|-----------|-------|------------------|
| Control                  | LPS    | TNF-alpha | IL6   | TNF-alpha + IL-6 |
| 8.00                     | 59.67  | 255.71    | 7.25  | 116.50           |
| 6.33                     | 101.20 | 257.63    | 9.00  | 132.50           |
| 3.43                     | 134.57 | 157.13    | 4.33  | 156.25           |
| 27.00                    | 64.25  | 117.67    | 4.33  | 152.29           |
| 36.13                    | 93.25  | 77.29     | 9.71  | 117.13           |
| 6.63                     | 56.00  | 138.63    | 34.88 |                  |
| 8.63                     |        | 113.13    | 31.38 |                  |
|                          |        | 73.50     | 17.17 |                  |
|                          |        |           | 15.50 |                  |

**Figure 6E**

| Tnf-alpha mRNA level |      |                |
|----------------------|------|----------------|
| Control              | LPS  | LPS<br>PLX3397 |
| 2.46                 | 2.82 | 1.06           |
| 0.40                 | 5.61 | 5.58           |
| 1.32                 | 8.22 | 2.54           |
| 0.78                 | 4.42 | 1.07           |
| 0.75                 | 2.90 | 1.23           |
| 1.34                 | 1.85 | 1.18           |
| 0.81                 | 1.68 | 1.80           |
| 1.23                 | 1.53 | 1.58           |

**Figure 7B**

| EdU+ Sox9+ cells / field |                    |            |                   |
|--------------------------|--------------------|------------|-------------------|
| Control AAV              | Control AAV<br>LPS | AAV-YAP5SA | AAV-YAP5SA<br>LPS |
| 57.63                    | 73.00              | 116.00     | 377.88            |
| 33.13                    | 83.75              | 264.00     | 344.63            |
| 37.38                    | 106.71             | 173.50     | 463.27            |
| 48.25                    | 105.75             | 235.00     | 330.25            |
| 63.50                    | 112.63             | 308.00     | 260.00            |
|                          | 101.25             | 264.75     |                   |

| <b>Figure 7D</b>                |            |            |                    |
|---------------------------------|------------|------------|--------------------|
| <b>EdU+ Sox9+ cells / field</b> |            |            |                    |
| <b>Control</b>                  | <b>LPS</b> | <b>EGF</b> | <b>EGF<br/>LPS</b> |
| 0.38                            | 124.38     | 331.63     | 623.25             |
| 22.75                           | 132.88     | 20.50      | 877.13             |
| 7.13                            | 183.38     | 559.00     | 672.29             |
| 5.00                            | 237.38     | 351.63     | 308.83             |
| 13.71                           | 308.38     | 67.71      | 450.38             |
| 8.14                            | 59.25      | 167.33     | 310.28             |
| 2.00                            | 489.75     | 90.43      | 239.88             |
| 6.60                            | 116.83     | 49.00      | 135.33             |
| 9.25                            | 24.67      | 290.20     | 312.43             |
| 53.38                           | 91.75      | 639.25     | 432.88             |
| 12.00                           | 172.25     | 231.00     | 115.00             |
| 10.88                           | 46.50      | 69.88      | 408.63             |
| 54.63                           | 130.63     | 27.50      | 295.00             |
| 39.00                           | 23.25      | 158.63     | 67.38              |
|                                 | 46.88      | 22.75      | 217.63             |
|                                 | 77.00      | 410.88     | 253.00             |
|                                 | 156.88     |            | 364.25             |
|                                 | 85.50      |            |                    |

| <b>Figure 7F</b>                |                                |                   |                               |
|---------------------------------|--------------------------------|-------------------|-------------------------------|
| <b>EdU+ Sox9+ cells / field</b> |                                |                   |                               |
| <b>Control AAV</b>              | <b>Control AAV<br/>PLX3397</b> | <b>AAV-YAP5SA</b> | <b>AAV-YAP5SA<br/>PLX3397</b> |
| 12.50                           | 1.57                           | 962.14            | 153.43                        |
| 30.75                           | 0.88                           | 729.00            | 226.50                        |
| 9.56                            | 1.14                           | 924.17            | 261.67                        |
| 12.75                           | 2.00                           | 824.13            | 118.67                        |
| 11.43                           | 1.88                           | 880.00            | 135.63                        |
|                                 | 1.75                           |                   | 131.25                        |
|                                 | 2.14                           |                   | 137.25                        |
|                                 | 0.67                           |                   | 206.00                        |
|                                 | 3.00                           |                   | 273.50                        |
|                                 |                                |                   | 282.29                        |

| <b>Figure 7H</b>                |                |            |                        |
|---------------------------------|----------------|------------|------------------------|
| <b>EdU+ Sox9+ cells / field</b> |                |            |                        |
| <b>Control</b>                  | <b>PLX3397</b> | <b>EGF</b> | <b>EGF<br/>PLX3397</b> |
| 4.88                            | 0.71           | 186.80     | 10.25                  |
| 3.40                            | 0.13           | 51.75      | 8.17                   |
| 2.20                            | 0.50           | 49.33      | 15.67                  |
| 26.43                           | 0.83           | 55.33      | 9.83                   |
| 43.17                           | 3.86           | 75.50      | 71.50                  |
| 14.80                           | 2.57           | 181.29     | 62.75                  |
| 57.00                           | 4.00           | 178.75     | 10.60                  |
|                                 |                | 173.60     |                        |

| <b>Figure 8A</b>       |            |
|------------------------|------------|
| <b>Asc1 mRNA level</b> |            |
| <b>Control</b>         | <b>LPS</b> |
| 0.74                   | 0.99       |
| 0.90                   | 1.22       |
| 0.80                   | 1.10       |
| 2.42                   | 1.42       |
| 0.64                   | 0.90       |
| 0.95                   | 0.41       |
| 1.62                   | 0.63       |
| 0.78                   | 0.41       |
| 0.97                   | 0.39       |
| 1.38                   | 0.74       |
| 0.75                   | 0.52       |
| 1.00                   | 0.40       |
| 0.53                   | 1.94       |
| 1.40                   | 0.39       |
| 1.35                   | 0.47       |
| 2.72                   | 0.78       |
| 0.53                   | 1.85       |
| 0.84                   | 0.65       |
| 0.84                   | 0.80       |
| 1.20                   | 0.56       |
| 0.84                   | 0.98       |
| 0.93                   | 0.59       |
| 1.08                   | 2.18       |
| 1.38                   | 1.17       |
| 0.67                   | 0.82       |
| 0.83                   | 0.87       |
| 1.37                   | 0.73       |
| 1.65                   | 1.00       |
| 0.69                   | 0.63       |
| 0.74                   | 0.79       |
| 1.17                   | 1.17       |
| 1.10                   | 1.16       |
| 0.95                   | 0.65       |
| 1.01                   | 0.96       |
| 0.83                   | 0.77       |
| 1.11                   | 0.91       |
| 1.07                   | 0.65       |
|                        | 0.12       |

| <b>Figure 8D</b>        |                |            |                |
|-------------------------|----------------|------------|----------------|
| <b>Ascl1 mRNA level</b> |                |            |                |
|                         |                | <b>LPS</b> |                |
| <b>Control</b>          | <b>PLX3397</b> | <b>LPS</b> | <b>PLX3397</b> |
| 1.18                    | 2.13           | 5.24       | 6.10           |
| 0.85                    | 1.19           | 6.04       | 7.39           |
| 0.58                    | 1.42           | 2.85       | 9.22           |
| 0.42                    | 1.48           | 1.25       | 5.06           |
| 1.90                    | 2.30           | 1.29       | 5.43           |
| 0.69                    | 1.15           | 1.90       | 4.25           |
| 2.09                    | 1.92           | 3.75       | 5.12           |
| 1.51                    |                | 1.48       | 2.80           |
| 1.27                    |                | 2.97       | 5.44           |
| 0.69                    |                | 1.94       | 9.29           |
| 0.94                    |                | 1.22       | 2.37           |
| 1.63                    |                | 1.67       | 4.28           |
| 0.76                    |                | 1.62       | 2.93           |
| 0.98                    |                | 1.29       | 5.13           |
|                         |                | 0.98       | 5.01           |
|                         |                |            | 2.90           |

| <b>Figure 9A</b>            |            |                |
|-----------------------------|------------|----------------|
| <b>Tnf-alpha mRNA level</b> |            |                |
|                             | <b>LPS</b> |                |
| <b>Control</b>              | <b>LPS</b> | <b>PLX3397</b> |
| 1.07                        | 5.23       | 2.39           |
| 0.68                        | 2.97       | 1.56           |
| 0.88                        | 6.12       | 5.20           |
| 1.02                        | 4.32       | 2.38           |
| 1.16                        | 6.04       | 0.79           |
| 1.33                        | 2.40       | 0.96           |
| 1.33                        | 2.26       | 0.81           |
| 0.67                        | 6.88       | 1.38           |
| 1.46                        | 0.65       | 0.95           |
| 1.63                        | 1.23       | 0.70           |
| 0.62                        | 2.73       | 0.25           |
| 0.75                        |            | 0.65           |
| 0.98                        |            | 0.76           |
| 0.63                        |            | 1.39           |
| 1.95                        |            | 2.45           |
| 1.12                        |            | 0.42           |

| <b>Figure 9B</b>        |            |                  |
|-------------------------|------------|------------------|
| <b>Ascl1 mRNA level</b> |            |                  |
| <b>Control</b>          | <b>LPS</b> | <b>TNF-alpha</b> |
| 0.78                    | 0.72       | 0.59             |
| 1.39                    | 0.46       | 0.44             |
| 1.05                    | 0.60       | 0.52             |
| 1.07                    | 0.74       | 0.50             |
| 0.82                    | 0.78       | 0.45             |
| 1.10                    | 1.29       | 0.57             |
| 1.12                    | 0.40       | 0.37             |
| 1.05                    | 1.03       | 0.53             |
| 0.78                    | 0.27       | 0.21             |
| 0.99                    | 0.59       | 0.31             |
|                         | 0.45       | 0.52             |
|                         |            | 0.50             |

| <b>Figure 9C</b>        |                          |
|-------------------------|--------------------------|
| <b>Ascl1 mRNA level</b> |                          |
| <b>TNF-alpha</b>        | <b>TNF-alpha PLX3397</b> |
| 1.79                    | 2.52                     |
| 1.16                    | 4.53                     |
| 1.23                    | 2.80                     |
| 0.73                    | 2.50                     |
| 1.06                    | 3.26                     |
|                         | 6.65                     |

| <b>Figure 9D</b>        |                    |                      |
|-------------------------|--------------------|----------------------|
| <b>Ascl1 mRNA level</b> |                    |                      |
| <b>Control</b>          | <b>LPS PLX3397</b> | <b>LPS TNF-alpha</b> |
| 0.93                    | 5.59               | 0.22                 |
| 1.46                    | 1.95               | 0.23                 |
| 0.71                    | 4.18               | 0.14                 |
|                         | 4.30               | 0.50                 |
|                         | 2.67               | 0.21                 |
|                         |                    | 0.41                 |
|                         |                    | 0.45                 |
|                         |                    | 0.54                 |

| <b>Figure S1</b>                                                     |                     |                |                     |
|----------------------------------------------------------------------|---------------------|----------------|---------------------|
| <b>BrdU+ cells / section normalized to the retina surface (a.u.)</b> |                     |                |                     |
| <b>Control</b>                                                       | <b>rho crispant</b> | <b>Control</b> | <b>rho crispant</b> |
| 0.00                                                                 | 0.13                | 0.07           | 0.74                |
| 0.02                                                                 | 0.12                | 0.09           | 2.30                |
| 0.05                                                                 | 0.06                | 0.07           | 1.60                |
| 0.02                                                                 | 0.03                | 0.09           | 0.84                |
| 0.00                                                                 | 0.04                | 0.09           | 3.40                |
| 0.00                                                                 | 0.11                | 0.08           | 2.00                |
| 0.02                                                                 | 0.12                |                |                     |

| <b>Figure S5B</b>    |                                    |
|----------------------|------------------------------------|
| IB4+ cells / section |                                    |
| CoCl <sub>2</sub>    | CoCl <sub>2</sub><br>Dex + PLX3397 |
| 24.40                | 9.60                               |
| 55.60                | 14.60                              |
| 27.00                | 4.20                               |
| 34.60                | 4.00                               |
| 15.00                | 9.00                               |
| 20.00                | 10.60                              |
| 18.00                | 11.40                              |
|                      | 9.20                               |
|                      | 4.00                               |
|                      | 6.80                               |
|                      | 1.60                               |
|                      | 16.20                              |
|                      | 7.00                               |
|                      | 16.20                              |
|                      | 12.00                              |
|                      | 2.60                               |
|                      | 2.80                               |
|                      | 3.80                               |
|                      | 7.00                               |

| <b>Figure S5D</b>    |                               |
|----------------------|-------------------------------|
| IB4+ cells / section |                               |
| rho crispant         | rho crispant<br>Dex + PLX3397 |
| 19.60                | 6.60                          |
| 19.40                | 4.40                          |
| 24.60                | 5.80                          |
| 5.40                 | 8.40                          |
| 11.00                | 3.80                          |
| 21.60                | 11.60                         |
| 15.00                | 10.60                         |
| 7.40                 | 11.20                         |
| 21.80                | 6.80                          |
| 18.20                | 6.40                          |
| 11.40                | 6.00                          |
| 22.60                | 6.40                          |
| 9.00                 | 9.80                          |
| 15.20                | 13.40                         |
| 12.00                | 9.00                          |
| 15.20                | 15.20                         |
| 10.60                | 11.75                         |
| 18.60                | 10.20                         |
|                      | 11.60                         |
|                      | 6.00                          |

| <b>Figure S7B</b>   |         |      |      |      |      |      |      |      |      |      |      |      |      |      |      |      |      |      |      |      |      |      |      |
|---------------------|---------|------|------|------|------|------|------|------|------|------|------|------|------|------|------|------|------|------|------|------|------|------|------|
| Bax/Bcl2 mRNA level |         |      |      |      |      |      |      |      |      |      |      |      |      |      |      |      |      |      |      |      |      |      |      |
|                     | Control |      |      |      |      |      |      |      |      |      | LPS  |      |      |      |      |      |      |      |      |      |      |      |      |
| DEV0                | 0.78    | 1.28 | 0.75 | 1.03 | 0.92 | 1.42 | 0.87 | 1.17 | 0.95 | 1.01 |      |      |      |      |      |      |      |      |      |      |      |      |      |
| DEV1                | 4.41    | 4.65 | 2.94 | 4.22 | 3.85 | 3.08 | 2.18 |      |      |      |      | 4.80 | 3.42 | 4.68 | 5.93 | 3.69 | 3.48 | 3.17 |      |      |      |      |      |
| DEV3                | 2.95    | 4.70 | 4.91 | 6.14 | 2.45 | 2.87 |      |      |      |      |      | 5.05 | 3.67 | 3.17 | 4.24 | 1.96 | 1.51 | 2.66 |      |      |      |      |      |
| DEV5                | 4.07    | 4.64 | 8.22 | 5.20 | 2.46 | 2.15 | 2.31 |      |      |      |      | 5.10 | 5.96 | 4.23 | 3.82 | 2.91 | 2.92 | 3.28 | 2.92 |      |      |      |      |
| DEV7                | 4.35    | 5.01 | 6.04 | 2.80 | 3.73 | 5.44 | 2.42 | 4.54 | 3.61 | 3.91 | 2.98 | 4.27 | 4.12 | 2.96 | 6.82 | 3.20 | 2.52 | 2.21 | 3.16 | 5.44 | 2.74 | 2.50 | 2.97 |

| <b>Figure S7C</b> |         |       |       |        |        |        |        |       |        |       |       |       |       |        |        |        |  |  |  |  |  |  |  |
|-------------------|---------|-------|-------|--------|--------|--------|--------|-------|--------|-------|-------|-------|-------|--------|--------|--------|--|--|--|--|--|--|--|
| Gfap mRNA level   |         |       |       |        |        |        |        |       |        |       |       |       |       |        |        |        |  |  |  |  |  |  |  |
|                   | Control |       |       |        |        |        |        |       |        |       | LPS   |       |       |        |        |        |  |  |  |  |  |  |  |
| DEV0              | 1.41    | 0.77  | 1.83  | 0.51   | 0.49   | 0.47   | 1.67   | 2.63  |        |       |       |       |       |        |        |        |  |  |  |  |  |  |  |
| DEV1              | 4.14    | 1.98  | 1.85  | 5.34   | 2.65   |        |        |       |        |       |       | 1.93  | 3.92  | 2.46   | 2.58   | 3.44   |  |  |  |  |  |  |  |
| DEV3              | 37.99   | 48.97 | 24.37 | 25.55  | 44.27  |        |        |       |        |       |       | 12.60 | 17.26 | 41.88  | 38.03  | 47.43  |  |  |  |  |  |  |  |
| DEV5              | 15.34   | 12.70 | 35.27 | 18.54  | 79.47  | 72.95  | 101.04 | 50.19 | 106.42 |       |       |       |       |        |        |        |  |  |  |  |  |  |  |
| DEV7              | 64.08   | 22.55 | 55.45 | 165.57 | 189.83 | 364.64 | 284.90 | 81.62 | 56.09  | 25.83 | 27.19 | 24.76 | 40.55 | 121.73 | 116.49 | 246.50 |  |  |  |  |  |  |  |

| <b>Figure S8B</b>   |     |                |
|---------------------|-----|----------------|
| Sox9+ cells / field |     |                |
| Control             | LPS | LPS<br>PLX3397 |
| 363                 | 365 | 307            |
| 324                 | 374 | 303            |
| 255                 | 366 | 416            |
| 457                 | 318 | 488            |
| 434                 | 353 | 337            |
| 461                 | 382 | 454            |
| 371                 | 439 | 350            |
| 400                 | 423 |                |

| <b>Figure S8C</b>   |      |         |                |
|---------------------|------|---------|----------------|
| Bax/Bcl2 mRNA level |      |         |                |
| Control             | LPS  | PLX3397 | LPS<br>PLX3397 |
| 0.77                | 1.09 | 1.16    | 1.18           |
| 1.25                | 0.72 | 1.02    | 1.30           |
| 0.80                | 0.97 | 1.17    | 1.06           |
| 1.18                | 0.89 | 0.91    | 0.84           |
|                     |      | 1.18    | 0.94           |

| <b>Figure S9B</b>   |                |
|---------------------|----------------|
| CD68+ cells / field |                |
| LPS                 | LPS<br>PLX5622 |
| 34.13               | 8.00           |
| 33.88               | 10.13          |
| 39.38               | 8.50           |
| 43.14               | 2.75           |
| 46.75               | 8.38           |
|                     | 6.88           |

| <b>Figure S9C</b>       |                |
|-------------------------|----------------|
| EdU+Sox9+ cells / field |                |
| LPS                     | LPS<br>PLX5622 |
| 81.25                   | 55.25          |
| 86.38                   | 36.00          |
| 81.13                   | 70.25          |
| 44.63                   | 18.88          |
| 120.38                  | 24.38          |
|                         | 22.63          |

**Table S5. Descriptive Statistics.**
